# Supplementary material
Source: PubMed Central journal article supplement (PMC9168803)
Supplement: NIHMS1648066-supplement-1.pdf [file NIHMS1648066-supplement-1.pdf]

# Supplementary Figure 1

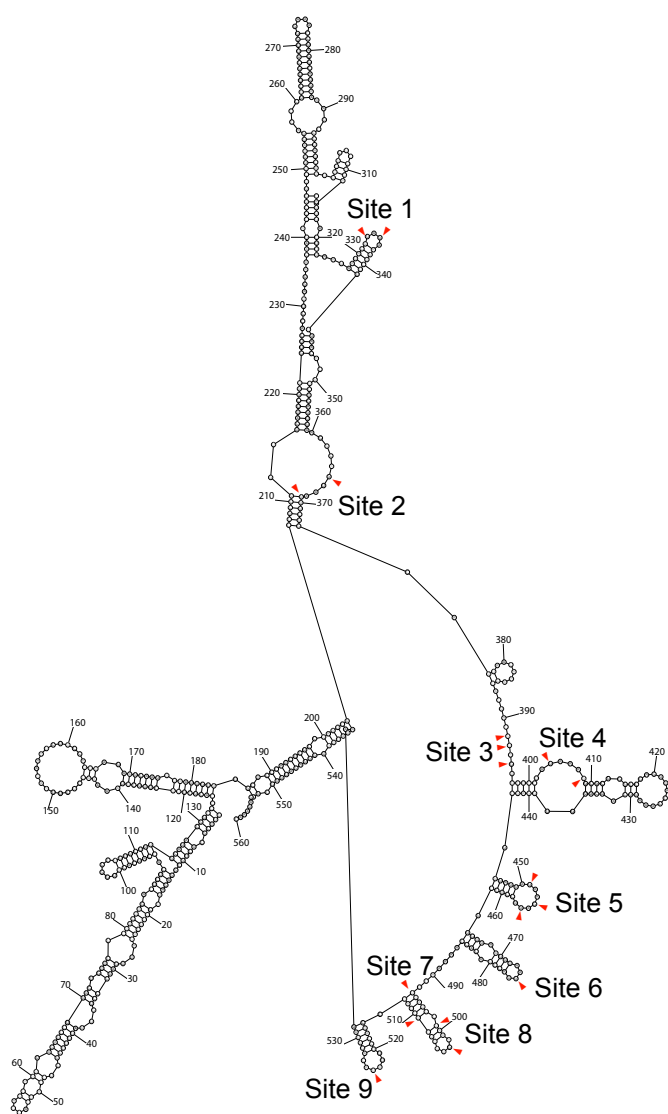

**WT ENERGY = -231.6 kJ m<sup>-1</sup>**

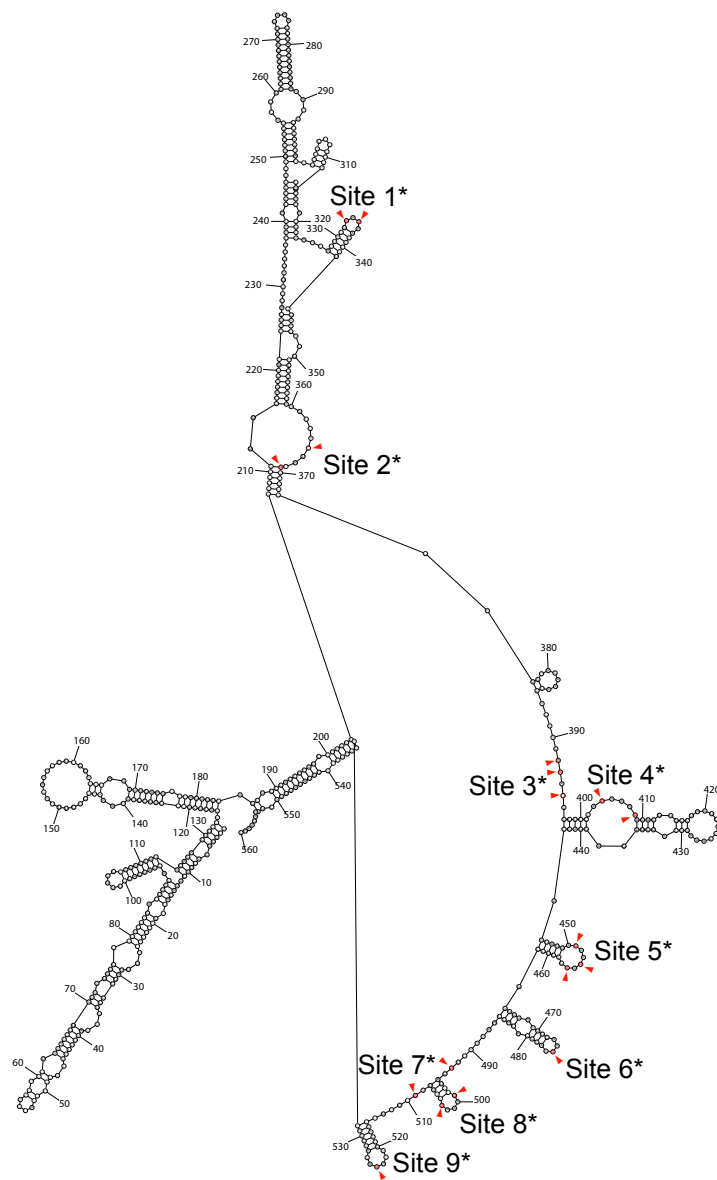

**M1-9 ENERGY = -227.3 kJ m<sup>-1</sup>**

**Supplementary Figure 1.** RNAStructure Predictions of WT and M1-9 Constructs. The first 560 nts of either the WT (left) or M1-9 (right), containing all 18 guanosine substitutions; RNA sequences were folded using RNAStructure online software. Predicted structures similar to previously published SHAPE data are depicted and Gibbs free energy calculations are shown below. Red arrows indicate individual guanosine residues in each site in the WT or the corresponding mutated nucleotides in M1-9. \* denotes sites containing mutated residues which are labeled red.
